# MicroRNA-21 as a potential diagnostic biomarker for breast cancer patients: a pooled analysis of individual studies

Ying Gao<sup>1,2,\*</sup>, Qiliang Cai<sup>3,\*</sup>, Yubei Huang<sup>2,\*</sup>, Shu Li<sup>1</sup>, Hongxi Yang<sup>1</sup>, Li Sun<sup>1</sup>, Kexin Chen<sup>2</sup>, Yaogang Wang<sup>1</sup>

<sup>1</sup>Department of Health Service Management, School of Public Health, Tianjin Medical University, Tianjin, 300070, China

<sup>2</sup>Department of Cancer Epidemiology and Biostatistics, Tianjin Medical University Cancer Institute and Hospital, Tianjin, 300060, China

<sup>3</sup>Department of Urology, The Second Hospital of Tianjin Medical University, Tianjin, 300211, China

\*Co-first authors, these authors contributed equally to this work

**Correspondence to:** Yaogang Wang, **email:** wangyg@tmu.edu.cn

**Keywords:** *microRNA-21, breast cancer, diagnostic, biomarker, meta-analysis*

**Received:** January 17, 2016

**Accepted:** April 16, 2016

**Published:** May 02, 2016

## ABSTRACT

**MicroRNA-21 (miR-21) has been reported as the potential novel diagnostic biomarker for breast cancer in several studies, but their results were inconsistent. Therefore, we conducted a systematic analysis to evaluate the diagnostic value of miR-21 in detecting breast cancer. A comprehensive electronic and manual search was conducted for relevant literatures through several databases up to November 9, 2015. QUADAS-2 was used to assess the quality of the studies included in the study. All statistical analyses were performed using Meta-Disc 1.4 and Stata 12.0. Eleven studies with a total of 918 breast cancer patients and 613 controls were included. The pooled sensitivity, specificity, positive likelihood ratio (PLR), negative likelihood ratio (NLR), and diagnostic odds ratio (DOR) with their 95% confidence intervals (CIs) were 0.72 (95% CI: 0.69–0.75), 0.80 (95% CI: 0.77–0.83), 3.37 (95% CI: 2.24–5.07), 0.30 (95% CI: 0.19–0.50), and 11.79 (95% CI: 5.23–26.57), respectively. The area under the curve of SROC was 0.8517. In conclusion, our analyses suggested that miR-21 is a promising biomarker in diagnosing breast cancer. For clinical purpose, further large-scale studies are warranted to validate its clinical application.**

## INTRODUCTION

Breast cancer is the most common cancer among women worldwide. Although breast cancer incidence rates still increases in many Western countries, mortality rates have been decreasing over the past two decades due to early detection and improved treatment [1]. The data from Surveillance, Epidemiology, and End Results Program (SEER) showed that the 5-year relative survival was 98.6% when diagnosed at localized stage as opposed to 23.3% when the disease at distant stage [2]. Thus, early detection and diagnosis has important clinical significances for breast cancer. The previous studies showed that the circulating tumor biomarkers such as carcinoembryonic antigen (CEA) and carbohydrate antigen 153 (CA153) are already applied in clinic, but these biomarkers are not useful to

detect early breast cancer due to their low sensitivity and they have long been used as prognostic markers to monitor disease progression or recurrence [3–5].

After the first report of elevated circulating levels of microRNA-21 (miR-21) in patients with diffuse large B-cell lymphoma [6], circulating miRNAs with their stability feature have been postulated as novel biomarkers for cancer processes, such as liver cancer, ovarian cancer, breast cancer [7–9]. Several studies have reported miR-21 as the potential novel diagnostic biomarker for breast cancer, but their results were inconsistent. A recent study suggested that the circulating miR-21 could serve as a potential serum-based biomarker for breast cancer detection in Chinese population, with 80.0% sensitivity and 87.7% specificity [10]. Another study investigated the diagnostic accuracy of single miR-21 and reported a much lower sensitivity with 25.8% [11]. In the Asaga's

study, significant up-regulation of miR-21 was detected, but it could not as candidate in the selection criteria at the microarray level [12]. Therefore, we conducted a systematic analysis to evaluate the diagnostic value of miR-21 in detecting breast cancer.

## RESULTS

### Included studies

A detailed flowchart of the review process was presented in Figure 1. A total of 504 articles were identified by initial search, with 503 records identified from database searching and 1 record by manual search. Two independent researchers reviewed articles for duplicates, excluding 169 records. After carefully reviewing titles and abstracts of 335 records, as a result, there were 277. Excluded: 248 were reviews, abstract and letters and 29 were not related to our topic, leaving 58 full-text articles for eligibility. Finally, 11 studies from 10 articles were included in this meta-analysis [10–19].

### Study characteristics and quality assessment

The main characteristics of included studies were summarized in Table 1. Among the 11 studies, 7 studies were conducted in China [10, 11, 13–27], 1 in USA [12], 2 in Mexico [18], and 1 in Egypt [19]. The publication years ranged from 2011 to 2015. A total of 918 breast cancer patients and 613 controls were included. Circulation miR-21 expression levels were measured in serum ( $n = 8$ ), tumor tissue ( $n = 2$ ), and plasma ( $n = 1$ ). In each study, the cutoff values of miR-21 appeared to be different. The quantitative real-time reverse transcription PCR method was used to measure the expression of miR-21. The sufficient data which were used to construct the  $2 \times 2$  table, such as True positive (TP), false positive (FP), false negative (FN), and true negative (TN), were successfully extracted. The quality assessment of the QUADAS-2 tool was shown in Figure 2. Overall, most studies presented they were of high quality relatively.

### Diagnostic accuracy and threshold analysis

Firstly, we conducted analysis of diagnostic threshold to explore whether the threshold effect was existed in this study, which was an important source of heterogeneity. The results showed that there was no heterogeneity from threshold effect with the spearman correlation coefficient of sensitivity and 1-specificity of 0.178 ( $P = 0.601$ ). Then Cochran-Q and inconsistency index ( $I^2$ ) were used to measure whether there was heterogeneity from non-threshold effect in order to choose appropriate calculation model. We used the random effects model to calculate those pooled diagnostic parameters for breast cancer. The pooled sensitivity, specificity,

positive likelihood ratio (PLR), negative likelihood ratio (NLR), and diagnostic odds ratio (DOR) with their 95% confidence intervals (CIs) were 0.72 (95% CI: 0.69–0.75, Figure 3A), 0.80 (95% CI: 0.77–0.83, Figure 3B), 3.37 (95% CI: 2.24–5.07, Figure 3C), 0.30 (95% CI: 0.19–0.50, Figure 3D), and 11.79 (95% CI: 5.23–26.57, Figure 4), respectively. The area under the curve (AUC) of SROC was 0.8517 (Figure 5).

### Meta-regression, subgroup analysis and publication bias

We also performed meta-regression analysis to explore source of heterogeneity based on ethnicity, sample size ( $\geq 100$  vs.  $< 100$ ), sample source, reference controls, RNA extraction, measurements (Table 2). The results showed that none of the above covariates contributed the heterogeneity (all  $P > 0.05$ ). Then we conducted subgroup analysis based on those covariates. The results of different subgroups were relatively consistent with the major results, which suggested that our results were relatively credible (Table 3). Moreover, Egger's test ( $P = 0.909$ ) or Begg's test ( $P = 0.488$ ) was detected and the results showed that there was no significant publication bias in our study.

## DISCUSSION

We performed a systematic review to evaluate the diagnostic value of miR-21 as a potential diagnostic biomarker for breast cancer patients. Our finding suggested that the pooled sensitivity, specificity, PLR, NLR and DOR were 0.72 (95% CI: 0.69–0.75), 0.80 (95% CI: 0.77–0.83), 3.37 (95% CI: 2.24–5.07), 0.30 (95% CI: 0.19–0.50) and 11.79 (95%CI: 5.23–26.57), respectively. The AUC of SROC was 0.8517.

Currently, a number of convenient and novel biomarkers have been established in the routine evaluation of breast cancer. Although estrogen receptor (ER) and human epidermal growth factor receptor-2 (HER2) for predicting the response to endocrine and biological therapies are already available, their performances are far from perfect. For example, there were still some non-responding patients in the assessment of ER and HER2 status [20, 21]. In addition, other molecular biomarkers, such as CEA, cytokeratin fragment (CYFRA 21-1), and neuron specific enolase (NSE), were limited in the clinic with their low sensitivity and specificity [22].

Recently, various studies showed that abnormal expression of miRNAs played an important role in the pathogenesis, metastasis and prognosis for breast cancer [23, 24]. Some studies reported that miR-21 might be as a potential biomarker for breast cancer diagnosis because breast cancer patients had higher serum miR-21 expression than healthy women [25, 26]. In our meta-analysis, the

**Table 1: Main characteristics of included studies**

| First author | Year | Country | Ethnicity | Sample size |          | TP  | FP | FN | TN  | Cut-off value            | Sample types | Reference controls | RNA extraction      | Measurements |
|--------------|------|---------|-----------|-------------|----------|-----|----|----|-----|--------------------------|--------------|--------------------|---------------------|--------------|
|              |      |         |           | Cases       | Controls |     |    |    |     |                          |              |                    |                     |              |
| Li           | 2011 | China   | Asian     | 33          | 49       | 17  | 3  | 16 | 46  | 18.32                    | Serum        | miR-16             | TRIzol              | SYBR         |
| Asaga        | 2011 | USA     | Caucasian | 102         | 20       | 72  | 3  | 30 | 17  | 3.3-dCq                  | Serum        | miR-16             | TRIzol              | SYBR         |
| Sun          | 2012 | China   | Asian     | 103         | 55       | 77  | 18 | 26 | 37  | 1.358 2 <sup>-ΔΔCt</sup> | Serum        | cel-miR-39         | Filter cartridge    | Taqman       |
| Wang         | 2012 | China   | Asian     | 50          | 39       | 40  | 5  | 10 | 34  | 4.58 2 <sup>-ΔΔCt</sup>  | Serum        | miR-16             | TRIzol              | SYBR         |
| Mar-Aguilar  | 2013 | Mexico  | Caucasian | 61          | 10       | 58  | 2  | 3  | 8   | 6.48 2 <sup>-ΔΔCt</sup>  | Serum        | 18S RNA            | miRNAeasy kit       | Taqman       |
| Mar-Aguilar  | 2013 | Mexico  | Caucasian | 50          | 10       | 38  | 4  | 12 | 6   | 6.48 2 <sup>-ΔΔCt</sup>  | Tissue       | 18S RNA            | miRNAeasy kit       | Taqman       |
| Gao          | 2013 | China   | Asian     | 89          | 55       | 78  | 7  | 11 | 48  | 13.22                    | Serum        | CA153, CEA         | TRIzol              | SYBR         |
| Lee          | 2013 | China   | Asian     | 110         | 15       | 99  | 4  | 11 | 6   | 2.5 2 <sup>-ΔΔCt</sup>   | Tissue       | 18S RNA            | TRIzol              | SYBR         |
| Ng           | 2013 | China   | Asian     | 170         | 100      | 128 | 22 | 42 | 78  | 2.34 2 <sup>-ΔΔCt</sup>  | Plasma       | miR-145            | TRIzol              | Taqman       |
| Li           | 2013 | China   | Asian     | 120         | 200      | 31  | 46 | 89 | 154 | NA*                      | Serum        | CA153, CEA         | Roche Elecsys       | Taqman       |
| Toraih       | 2015 | Egypt   | Caucasian | 30          | 60       | 20  | 8  | 10 | 52  | 7.02 2 <sup>-ΔΔCt</sup>  | Serum        | RNU6B              | Qiagen miRNeasy kit | Taqman       |

\*Data unavailable.

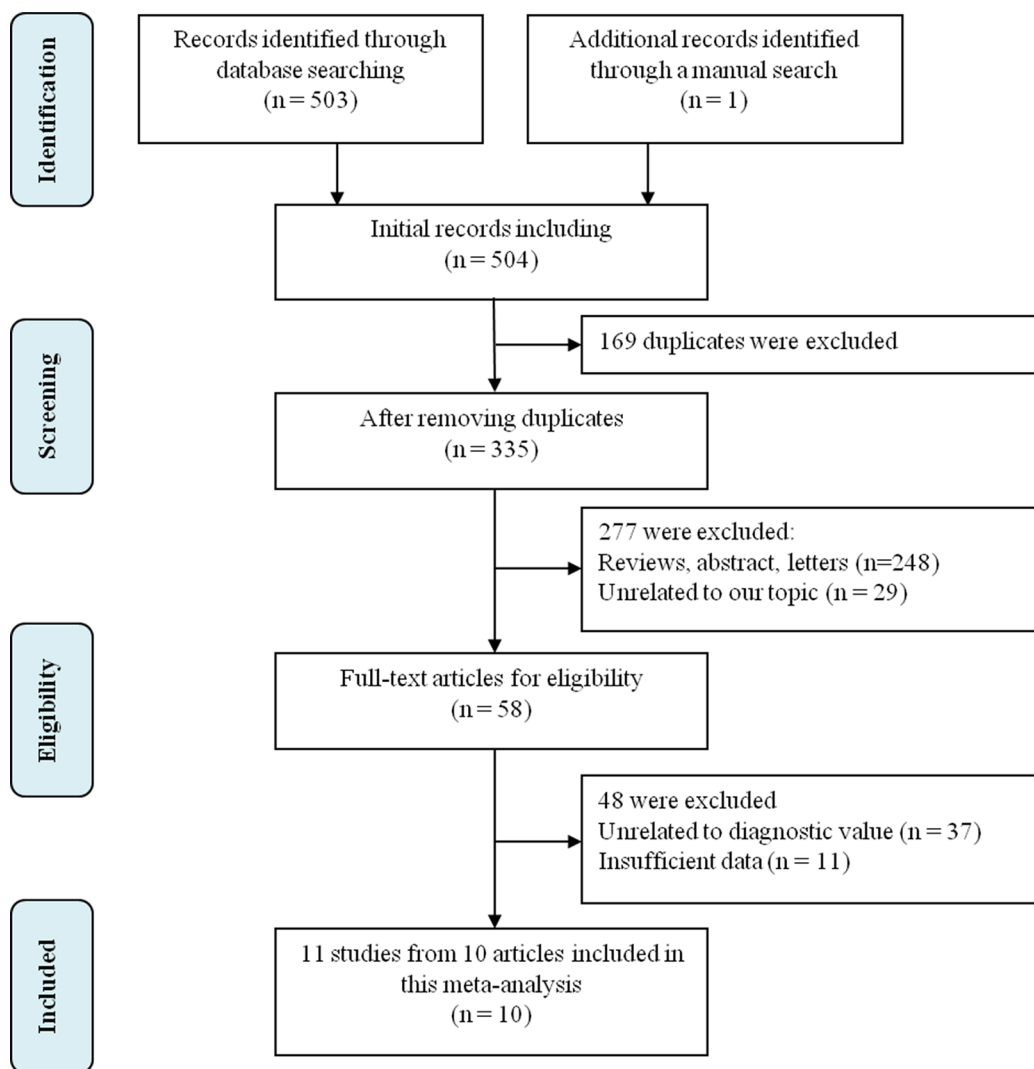

**Figure 1: A detailed flowchart of the review process.**

**Table 2: Results of the multivariable meta-regression model for the characteristics with backward regression analysis (Inverse variance weights)**

| Variables          | Coefficient | Standard Error | P      | RDOR  | 95% CI      |
|--------------------|-------------|----------------|--------|-------|-------------|
| Cte                | 5.451       | 0.7895         | 0.0023 | ---   | ---         |
| S                  | 0.205       | 0.1766         | 0.3095 | ---   | ---         |
| Ethnic             | 0.424       | 0.4500         | 0.3992 | 1.53  | 0.44–5.33   |
| Sample size        | -1.304      | 0.5388         | 0.0519 | 0.27  | 0.08–1.04   |
| Sample types       | -0.243      | 0.2440         | 0.3568 | 0.78  | 0.43–1.42   |
| Reference controls | -0.056      | 0.2244         | 0.8178 | 0.95  | 0.46–1.93   |
| RNA extraction     | -1.131      | 0.5786         | 0.0863 | 0.32  | 0.08–1.23   |
| Measurements       | 2.768       | 1.2297         | 0.0742 | 15.92 | 0.67–375.70 |

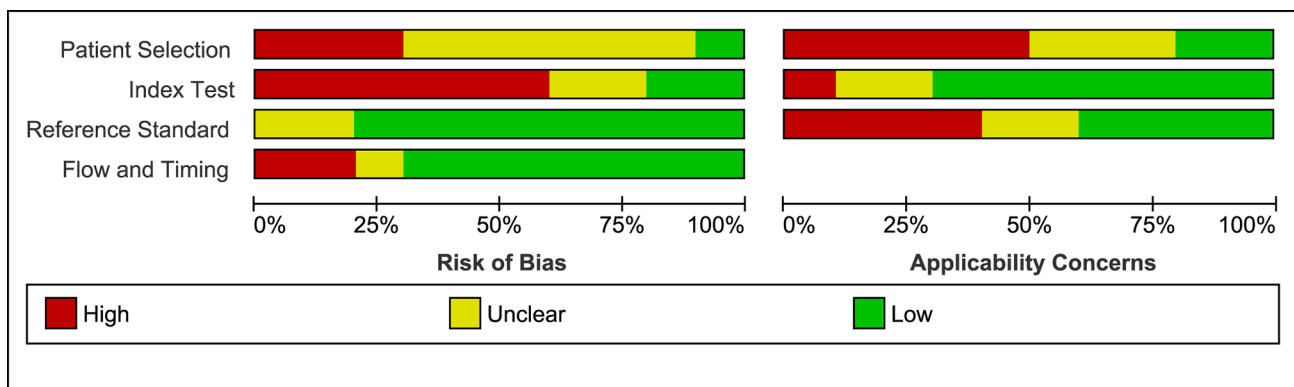

**Figure 2: Risk of bias and applicability concerns graph a review of authors' judgments about each domain presented as percentages across included studies.**

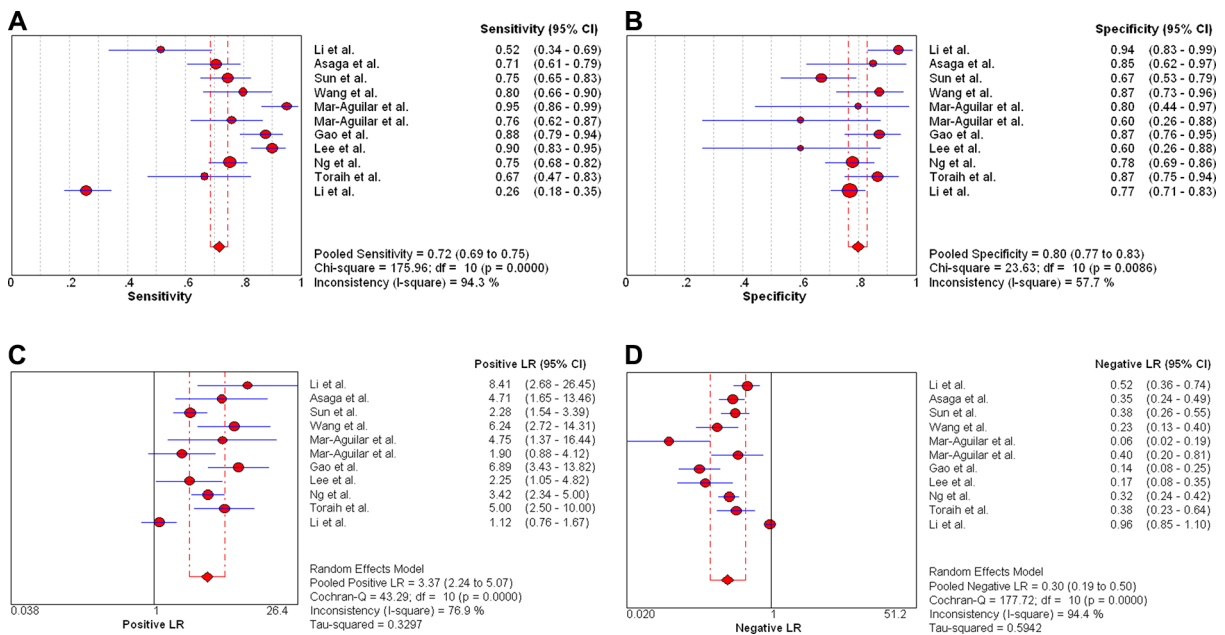

**Figure 3: Forest plots of pooled sensitivity (A), specificity (B), positive likelihood ratio (C), and negative likelihood ratio (D) for miR-21 in the diagnosis of breast cancer.**

**Table 3: Results of subgroup analysis in diagnostic accuracy of miR-21 for breast cancer**

| Subgroup          | No. of studies<br>(No. of cases) | Sensitivity<br>(95% CI) | Specificity<br>(95% CI) | PLR<br>(95% CI)      | NLR<br>(95% CI)     | DOR<br>(95% CI)        | AUC    |
|-------------------|----------------------------------|-------------------------|-------------------------|----------------------|---------------------|------------------------|--------|
| Ethnicity         |                                  |                         |                         |                      |                     |                        |        |
| Asian             | 7 (675)                          | 0.70<br>(0.66–0.73)     | 0.79<br>(0.76–0.83)     | 3.27<br>(1.92–5.56)  | 0.33<br>(0.17–0.62) | 10.64<br>(3.66–30.97)  | 0.8472 |
| Caucasian         | 4 (243)                          | 0.77<br>(0.72–0.82)     | 0.83<br>(0.74–0.90)     | 3.65<br>(2.18–6.11)  | 0.29<br>(0.17–0.49) | 13.73<br>(5.54–34.04)  | 0.8625 |
| Sample size       |                                  |                         |                         |                      |                     |                        |        |
| ≥ 100             | 5 (605)                          | 0.67<br>(0.63–0.71)     | 0.76<br>(0.71–0.80)     | 2.32<br>(1.41–3.82)  | 0.38<br>(0.19–0.75) | 6.31<br>(2.09–19.00)   | 0.7935 |
| < 100             | 6 (313)                          | 0.80<br>(0.75–0.84)     | 0.87<br>(0.82–0.91)     | 4.89<br>(3.13–7.62)  | 0.26<br>(0.15–0.44) | 20.89<br>(10.14–43.06) | 0.8948 |
| Sample types      |                                  |                         |                         |                      |                     |                        |        |
| Serum             | 8 (588)                          | 0.67<br>(0.63–0.71)     | 0.81<br>(0.77–0.85)     | 3.95<br>(2.19–7.12)  | 0.31<br>(0.17–0.57) | 13.46<br>(4.37–41.41)  | 0.8865 |
| Tissue            | 2 (160)                          | 0.86<br>(0.79–0.91)     | 0.60<br>(0.36–0.81)     | 2.07<br>(1.20–3.56)  | 0.26<br>(0.11–0.62) | 8.04<br>(2.86–22.58)   | —      |
| Plasma            | 1 (170)                          | —                       | —                       | —                    | —                   | —                      | —      |
| Reference control |                                  |                         |                         |                      |                     |                        |        |
| miR-16            | 3 (185)                          | 0.70<br>(0.63–0.76)     | 0.90<br>(0.83–0.95)     | 6.18<br>(3.51–10.89) | 0.36<br>(0.24–0.55) | 18.81<br>(9.06–39.06)  | 0.8954 |
| 18S RNA           | 3 (221)                          | 0.88<br>(0.83–0.92)     | 0.67<br>(0.47–0.83)     | 2.37<br>(1.44–3.89)  | 0.17<br>(0.06–0.46) | 15.09<br>(3.49–65.19)  | 0.5981 |
| CA153, CEA        | 2 (209)                          | 0.82<br>(0.74–0.89)     | 0.87<br>(0.79–0.93)     | 5.86<br>(3.59–9.58)  | 0.23<br>(0.09–0.63) | 15.40<br>(6.97–92.54)  | —      |
| RNA extraction    |                                  |                         |                         |                      |                     |                        |        |
| TRIzol            | 6 (554)                          | 0.78<br>(0.75–0.82)     | 0.84<br>(0.79–0.88)     | 4.45<br>(3.02–6.54)  | 0.28<br>(0.19–0.40) | 17.90<br>(10.63–30.15) | 0.8800 |
| Others            | 5 (364)                          | 0.62<br>(0.56–0.67)     | 0.77<br>(0.72–0.81)     | 2.36<br>(1.35–4.13)  | 0.36<br>(0.17–0.77) | 6.84<br>(1.95–23.97)   | 0.8058 |
| Measurements      |                                  |                         |                         |                      |                     |                        |        |
| SYBR              | 5 (384)                          | 0.80<br>(0.75–0.84)     | 0.87<br>(0.81–0.92)     | 5.02<br>(3.09–8.16)  | 0.26<br>(0.16–0.43) | 23.59<br>(13.66–40.73) | 0.8974 |
| Taqman            | 6 (534)                          | 0.78<br>(0.73–0.81)     | 0.77<br>(0.71–0.82)     | 3.02<br>(2.17–4.19)  | 0.32<br>(0.22–0.45) | 10.03<br>(5.50–18.26)  | 0.8289 |

pooled sensitivity and specificity were 0.72 and 0.80, which indicated that the diagnostic accuracy may not be high enough as expected. The results were consistent with the recently published studies by Li et al. and Shen et al. [27, 28]. However, compared with some traditional biomarkers, such as CEA, NSE (with sensitivities of 0.48 and 0.39), miR-21 still had higher diagnostic value in detecting breast cancer. The PLR and NLR were used to estimate the diagnostic accuracy in clinical level. The pooled PLR of 3.37 suggested that breast cancer patients could have about 3.37-fold higher chance of being miR-21 positive compared to healthy controls. The pooled NLR of 0.30 indicated that the

possibility of individuals having cancer was 30% if the miR-21 was negative. Moreover, the value of DOR ranged from 0 to infinity, with higher value meaning better test discrimination [29]. The area under curve is another parameter to evaluate the diagnostic value. The ideal SROC curve position is near the upper-left corner which would imply a perfect test [30]. Statistically, if the range of AUC was 0.97 or above which was considered to have excellent accuracy; the range of AUC 0.93–0.96 was considered to be very good; the range of AUC 0.75–0.92 was considered to be good; and a range of AUC less than 0.75 should be cautiously to evaluate the accuracy which might be a random test [31]. Our results of DOR and AUC was



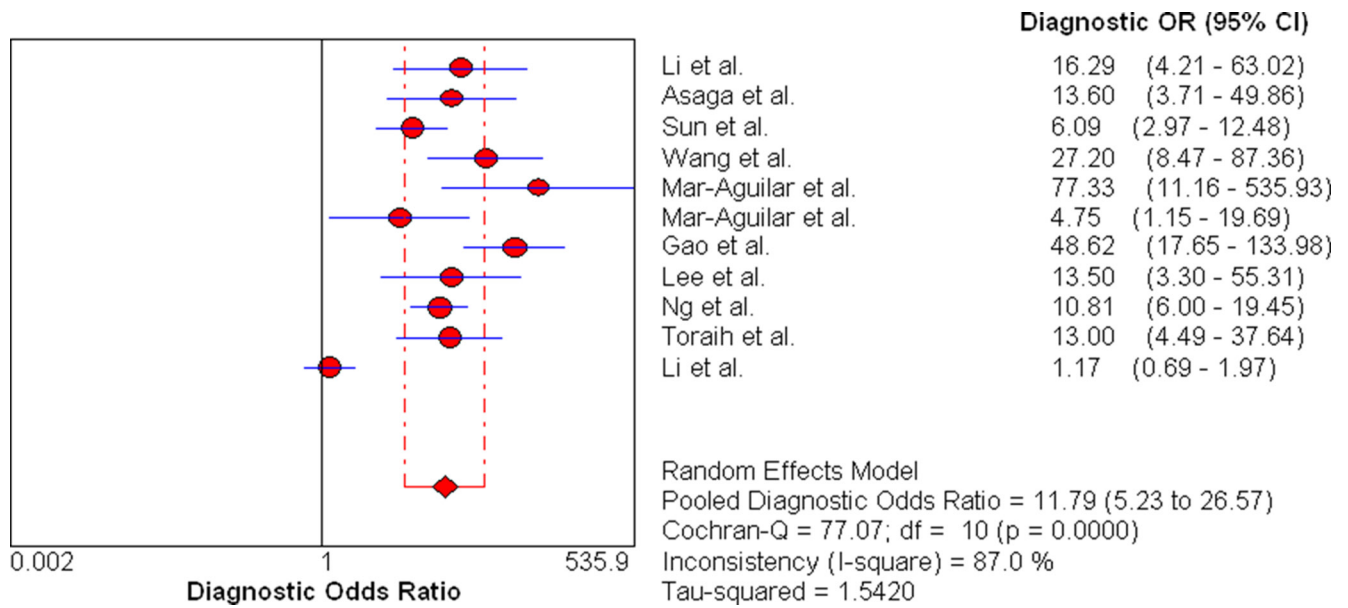

Figure 4: Forest plots of pooled diagnostic odds ratio for miR-21 in the diagnosis of breast cancer.

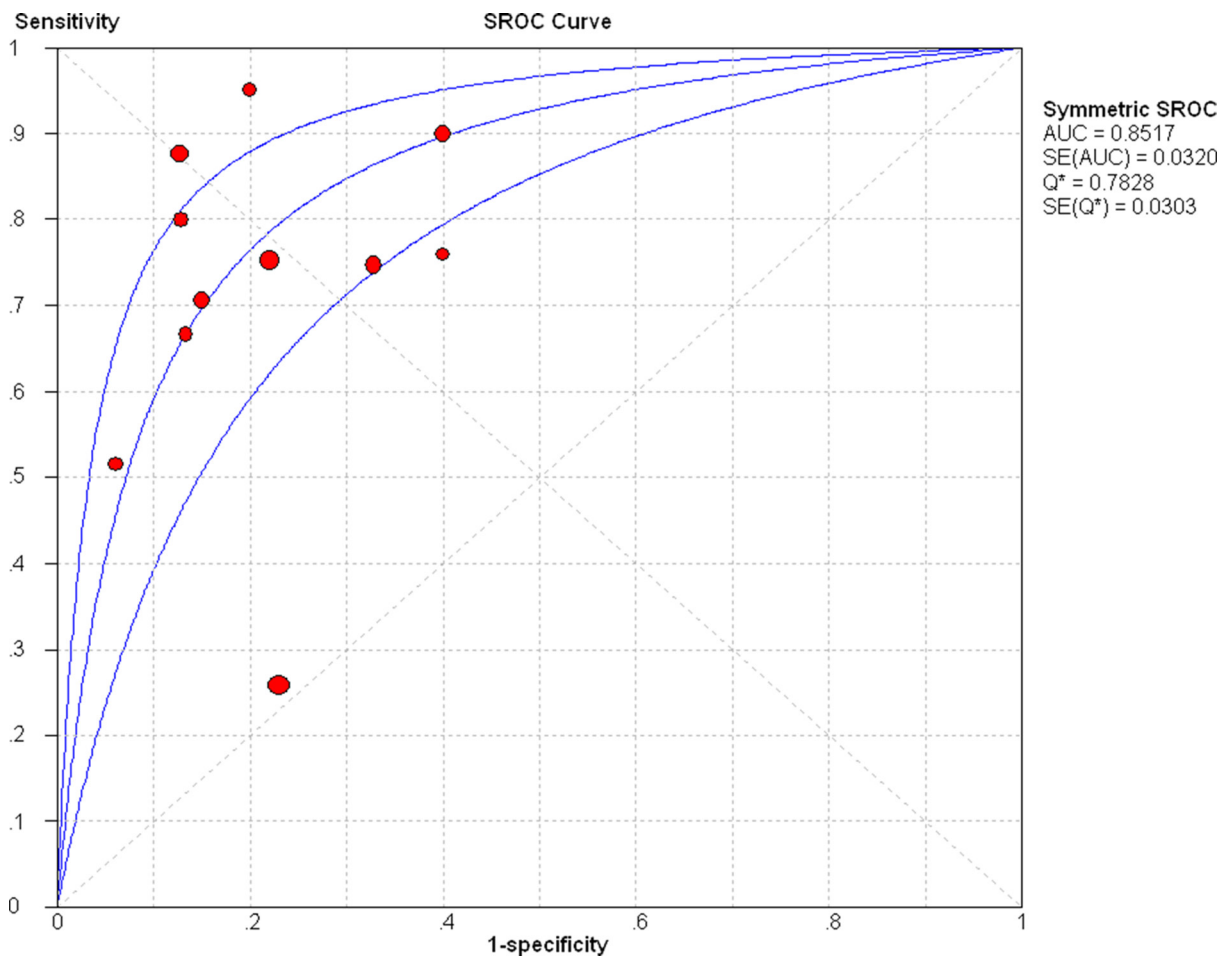

Figure 5: Summary receiver operating characteristic (SROC) curve for miR-21 in the diagnosis of breast cancer.

11.79 and 0.8517, respectively, which indicated the overall accuracy in diagnosing breast cancer was high.

Exploring the sources of heterogeneity is important in a meta-analysis. In this study, there was no heterogeneity from threshold effect with the Spearman correlation coefficient of sensitivity and 1-specificity of 0.178. However, substantial heterogeneity was found during the analyzing several parameters. Meta-regression and some subgroup analyses were conducted according to the major attributes of primary studies. In present study, different measures such as reference controls, RNA extraction and measurement methods, were used to extract miR-21 in different studies. All these variables may influence the heterogeneity. As a result, we failed to find the sources. On the other hand, we also analyzed miR-21 diagnostic efficiency in three different sample types. The subgroup analysis showed that serum-based miR-21 had higher accuracy than miR-21 in tissue for diagnosing breast cancer. Other results of different subgroups were relatively consistent with the major results, which suggested that our results were relatively credible.

There were several potential limitations in our study. Firstly, the results may suffer from publication bias in our study, because studies with null results tend not to be published. Publication languages were limited to English and Chinese. Other potentially eligible studies which met our inclusion criteria may not be included. Secondly, sample sizes of studies included in this meta-analysis were small, which may appear a small-study effect. Thirdly, only Asian and Caucasian populations were considered in subgroup analysis, with no African population involved, which may cause selection bias from population.

In conclusion, our analyses suggested that miR-21 is a promising biomarker in diagnosing breast cancer. For clinical purpose, further large-scale studies are warranted to validate its clinical application.

## MATERIALS AND METHODS

Our present study was performed in accordance with the guidelines for the Preferred Reporting Items for Systematic reviews and Meta-Analyses (PRISMA) [31].

### Search strategy

Two researchers independently searched PubMed, Embase, Chinese National Knowledge Infrastructure (CNKI), Wan Fang Data, and VIP database to identify relevant studies which evaluated the diagnostic value of miR-21 for breast cancer patients, up to November 9, 2015. A manual review of relevant publications was also performed to obtain additional studies. The following search terms were used to retrieve articles and abstracts: (microRNA-21 or micro RNA 21 or miRNA-21 or miR-21) and (breast cancer or breast tumor or breast neoplasm or

breast carcinoma). Only the most recent or the largest sample size study was included in the final analysis. Publication languages were limited to English and Chinese.

### Study selection

Studies included in present meta-analyses should meet the following criteria: (1) diagnostic effect about miR-21 for breast cancer; (2) breast cancer was confirmed by pathological examination; (3) the levels of miR-21 in tissue or serum was determined; (4) sensitivity, specificity, and cut-off values can be found in identified studies or calculated from the provided data. While the exclusion criteria were listed as follow: (1) studies without sufficient data to construct the  $2 \times 2$  table; (2) Meta-analyses, reviews, comments, letters, editorial articles, conference abstracts, meeting, and animal and cell studies; (3) publications were identified as duplicates.

### Data extraction

Two researchers reviewed the abstract first independently and then summarized the full selected articles. Any disagreements were resolved by discussion or consulting the third reviewer. The relevant data were extracted as follow: first author, publication years, country of origin, ethnicity, number of patients and controls, true and false positive and negative, cut-off value, sample types, reference control, RNA extraction, measurements.

### Quality assessment

Quality Assessment of Diagnostic Accuracy Studies 2 (QUADAS-2) [32] was used to assess the quality of the studies included in this meta-analysis independently by the same two researchers. Each of the assessment has seven questions with the answered with “yes”, “no”, or “unclear”. The answer of “yes” means that a study’s risk bias can be judged as low, while “no” and “unclear” mean that the risk of bias can be judged as high.

### Statistical analysis

Pooled sensitivity, pooled specificity, positive likelihood ratio, negative likelihood ratio, diagnostic odds ratio, and corresponding 95% CIs were calculated to evaluate the diagnostic value of miR-21. Summary receiver operator characteristics which shows the relationship between sensitivity and 1-specificity, was used to evaluate the consistency of results among all studies and the accuracy of the diagnostic test. The Spearman correlation coefficient was used to test the diagnostic threshold effect, which may produce significant heterogeneity ( $P < 0.05$ ). Additionally, the chi-square,  $Q$  value and  $I^2$  test were used to assess the heterogeneity

from non-threshold effect. A value of  $P$  less than 0.1 or an  $P \geq 50\%$  indicated the existence of significant heterogeneity. Meta-regression and subgroup analyses were conducted to explore sources of heterogeneity. Egger's test [33] and Begg's test [34] were performed to examine the potential publication bias. All statistical analyses were performed using Meta-Disc 1.4 and Stata 12.0 [35].

## CONFLICTS OF INTEREST

The authors declare no conflicts of interest.

## ACKNOWLEDGMENTS AND FUNDING

This work was supported in part by the Chinese National Key Scientific and Technological Project (Grants No: 2014BAI09B09 and 2015BAI12B15), the Program for Changjiang Scholars and Innovative Research Team in University in China (Grant No: IRT\_14R40), and Tianjin Science and Technology Committee Foundation (Grant No: 11ZCGYSY0220).

## REFERENCES

1. Jemal A, Bray F, Center MM, Ferlay J, Ward E, Forman D. Global Cancer Statistics. *CA Cancer J Clin*. 2011; 61: 69–90.
2. Howlader N, Noone AM, Krapcho M. SEER Cancer Statistics Review, 1975–2008. National Cancer Institute. Bethesda. 2011. [http://seer.cancer.gov/csr/1975\\_2008/](http://seer.cancer.gov/csr/1975_2008/) (last access: 01/09/16).
3. Harris L, Fritsche H, Mennel R, Norton L, Ravdin P, Taube S, Somerfield MR, Hayes DF, Bast RC Jr. American Society of Clinical Oncology 2007 update of recommendations for the use of tumor markers in breast cancer. *J Clin Oncol*. 2007; 25:5287–5312.
4. O'Hanlon DM, Kerin MJ, Kent P, Maher D, Grimes H, Given HF. An evaluation of preoperative CA15-3 measurement in primary breast carcinoma. *Br J Cancer*. 1995; 71:1288–1291.
5. Uehara M, Kinoshita T, Hojo T, Akashi-Tanaka S, Iwamoto F, Fukutomi T. Long-term prognostic study of carcinoembryonic antigen (CEA) and carbohydrate antigen 15–3 (CA 15–3) in breast cancer. *Int J Clin Oncol*. 2007; 13:447–451.
6. Lawrie CH, Gal S, Dunlop HM, Pushkaran B, Liggins AP, Pulford K, Banham AH, Pezzella F, Boulwood J, Wainscoat JS, Hatton CS, Harris AL. Detection of elevated levels of tumor-associated microRNAs in serum of patients with diffuse large B-cell lymphoma. *Br J Haematol*. 2008; 141:672–675.
7. Zhang B, Pan X, Cobb GP, Anderson TA. MicroRNAs as oncogenes and tumor suppressors. *Dev Biol*. 2007; 302:1–12.
8. Zheng D, Haddadin S, Wang Y, Gu LQ, Perry MC, Freter CE, Wang MX. Plasma microRNAs as novel biomarkers for early detection of lung cancer. *Int J of Clin Exp Pathol*. 2011; 4:575–586.
9. Resnick KE, Alder H, Hagan JP, Richardson DL, Croce CM, Cohn DE. The detection of differentially expressed microRNAs from the serum of ovarian cancer patients using a novel real-time PCR platform. *Gynecol Oncol*. 2009; 112:55–59.
10. Wang B, Zhang QY. The expression and clinical significance of circulating microRNA-21 in serum of five solid tumors. *J Cancer Res Clin Oncol*. 2012; 138:1659–1666.
11. Li SX, Guo GL, Chen SX, Jiang YY, Zeng Q. The value of miR-21 combined with CA153, CA125, CA-199 detection in early diagnosis of breast cancer. *China Modern Doctor*. 2013; 51:67–69.
12. Asaga S, Kuo C, Nguyen T, Terpenning M, Giuliano AE, Hoon DS. Direct serum assay for microRNA-21 concentrations in early and advanced breast cancer. *Clin Chem*. 2011; 57:84–91.
13. Li XF, Xu JJ, Zhang QY. Establishment of real-time PCR for detecting serum microRNA-21 and its preliminary application in breast cancer. *Chin J Lab Med*. 2011; 34: 920–925.
14. Gao JJ, Zhang Q, Xu J, Guo L, Li X. Clinical significance of serum miR-21 in breast cancer compared with CA153 and CEA. *Chin J Cancer Res*. 2013; 25:743–748.
15. Ng EK, Li R, Shin VY, Jin HC, Leung CP, Ma ES, Pang R, Chua D, Chu KM, Law WL, Law SY, Poon RT, Kwong A. Circulating microRNAs as Specific Biomarkers for Breast Cancer Detection. *PLoS One*. 2013; 8:e53141.
16. Lee CH, Kuo WH, Lin CC, Oyang YJ, Huang HC, Juan HF. MicroRNA-Regulated Protein-Protein Interaction Networks and Their Functions in Breast Cancer. *Int J Mol Sci*. 2013; 14:11560–11606.
17. Sun Y. Novel serum biomarkers in breast cancer: detection and clinical significance [Master]: National Center for Clinical Laboratory. 2012.
18. Mar-Aguilara F, Mendoza-Ramirez JA, Malagon-Santiago I, Espino-Silva PK, Santuario-Facio SK, Ruiz-Flores P, Rodrigues-Padilla C, Resendez-perez D. Serum circulating microRNA profiling for identification of potential breast cancer biomarkers. *Dis Markers*. 2013; 34:163–169.
19. Torain EA, Mohammed EA, Farrag S, Ramsis N, Hosny S. Pilot Study of Serum MicroRNA-21 as a Diagnostic and Prognostic Biomarker in Egyptian Breast Cancer Patients. *Mol Diagn Ther*. 2015, 19:179–190.
20. Thompson A, Brennan K, Cox A, Gee J, Harcourt D, Harris A, Harvie M, Holen I, Howell A, Nicholson R, Steel M, Streuli C. Evaluation of the current knowledge limitations in breast cancer research: a gap analysis. *Breast Cancer Res*. 2008; 10:R26.
21. Piccart-Gebhart MJ, Procter M, Leyland-Jones B, Goldhirsch A, Untch M, Smith I, Gianni L, Baselga J,



- Bell R, Jackisch C, Cameron D, Dowsett M, Barrios CH, et al. Herceptin Adjuvant (HERA) Trial Study Team: Trastuzumab after adjuvant chemotherapy in HER2-positive breast cancer. *N Engl J Med.* 2005; 353:1659–1672.
22. O'Byrne KJ, Gatzemeier U, Bondarenko I, Barrios C, Eschbach C, Martens UM, Hotko Y, Kortsik C, Paz-Ares L, Pereira JR, von Pawel J, Ramlau R, Roh JK, et al. Molecular biomarkers in non-small-cell lung cancer: a retrospective analysis of data from the phase 3 FLEX study. *Lancet Oncol.* 2011; 12:795–805.
  23. Gotte M. MicroRNAs in breast cancer pathogenesis. *Minerva Ginecol.* 2010; 62:559–571.
  24. Sreekumar E, Sayan BS, Mirnezami AH, Sayan AE. MicroRNA control of invasion and metastasis pathways. *Front Genet.* 2011; 2:58.
  25. Lowery AJ, Miller N, McNeill RE, Kerin MJ. MicroRNAs as prognostic indicators and therapeutic targets: potential effect on breast cancer management. *Clin cancer Res.* 2008; 14:360–365.
  26. Andorfer CA, Necela BM, Thompson EA, Perez EA. MicroRNA signatures: clinical biomarkers for the diagnosis and treatment of breast cancer. *Trends Mol Med.* 2011; 17:313–319.
  27. Li S, Yang X, Yang J, Zhen J, Zhang D. Serum microRNA-21 as a potential diagnostic biomarker for breast cancer: a systematic review and meta-analysis. *Clin Exp Med.* 2014.
  28. Shen L, Wan Z, Ma Y, Wu L, Liu F, Zang H, Xin S. The clinical utility of microRNA-21 as novel biomarker for diagnosing human cancers. *Tumor Biol.* 2015; 36: 1993–2005.
  29. Glas AS, Lijmer JG, Prins MH, Bossel GJ, Bossuyt PM. The diagnostic odds ratio: a single indicator of test performance. *J Clin Epidemiol.* 2003; 56:1129–1135.
  30. Walter SD. Properties of the summary receiver operating characteristic (SROC) curve for diagnostic test data. *Stat Med.* 2002; 21:1237–1256.
  31. Moher D, Liberati A, Tetzlaff J, Altman DG. Preferred reporting items for systematic reviews and meta-analyses: The PRISMA statement. *PLoS Med.* 2009; 6:e1000097.
  32. Whiting PF, Rutjes AW, Westwood ME, Mallett S, Deeks JJ, Reitsma JB, Leeflang MM, Sterne JA, Bossuyt PM. QUADAS-2: a revised tool for the quality assessment of diagnostic accuracy studies. *Ann Intern Med.* 2011; 155:529–536.
  33. Egger M, Davey SG, Schneider M, Minder C. Bias in meta-analysis detected by a simple, graphical test. *BMJ.* 1997; 315:629–634.
  34. Begg CB, Mazumdar M. Operating characteristics of a rank correlation test for publication bias. *Biometrics.* 1994; 50:1088–1101.
  35. Zamora J, Abraira V, Muriel A, Khan K, Coomarasamy A. Meta-Disc: a software for meta-analysis of test accuracy data. *BMC Med Res Methodol.* 2006; 6: 31.
